# Supplementary material for: Protein expression of S100A2 reveals it association with patient prognosis and immune infiltration profile in colorectal cancer
Source: PubMed Central journal article supplement (PMC10355195; doi:10.7150/jca.83910), 2023-06-19
Supplement: jcav14p1837s1.pdf [file jcav14p1837s1.pdf]

## Supplementary figures

$$\frac{\text{Total number of cells count in stroma}}{\text{Total cells count in stroma}} \times 100 = \text{Percentage of cells on stroma area}$$

**FigureS1** To calculate the percentage of positive cells in the stromal area, 3 replicates TMAs were constructed and obtained the average value of the staining. After that, the averaged value of positive cells was divided by the total number of cells to acquire the percent proportion of positive cells in each TMA core either in tumour or stromal area.

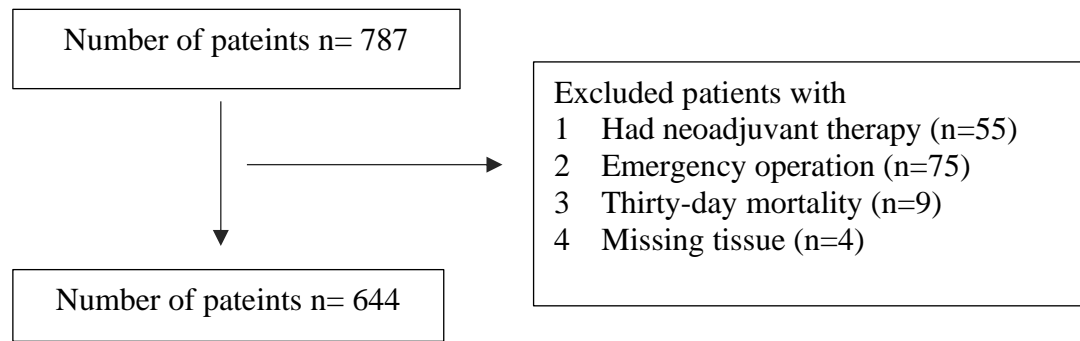

**FigureS2** Consort diagram demonstrating how patients have been selected for the study

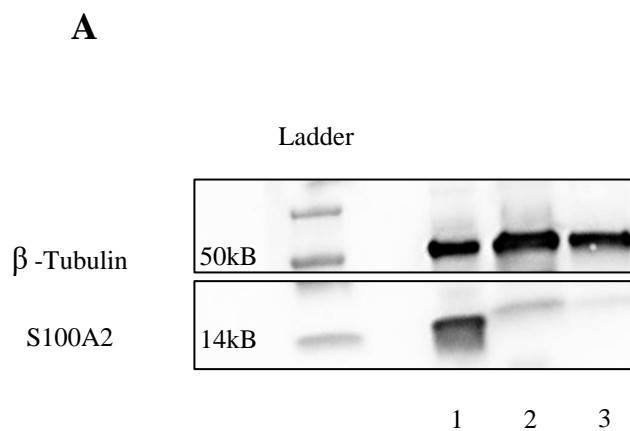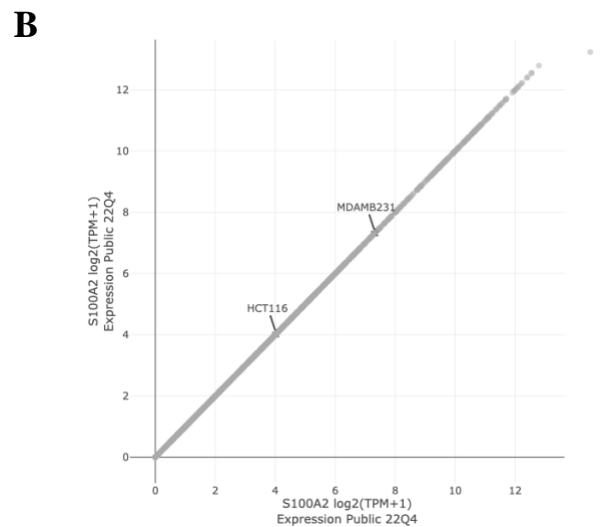

**FigureS3** Antibody specificity test (A) Protein expression of S100A2 using western blot analysis of (1) 293T overexpressed S100A2, (2) MDA-MB-231 and (3) HCT116 protein lysates. Precision Plus Protein™ Dual Xtra Prestained Protein Standards (Bio-Rad) was used to visualised molecular weight. Samples were load onto for antibody specificity (n=3). S100A2 was 14 kDa and  $\beta$ -tubulin were used for internal housekeeping control (50 kDa) (B) S100A2 expression in tumour cell lines from DepMap

**CSS Cut Offs**

|          | cutpoint | statistic      |
|----------|----------|----------------|
| S100A2_N | 90       | 2.726030589344 |

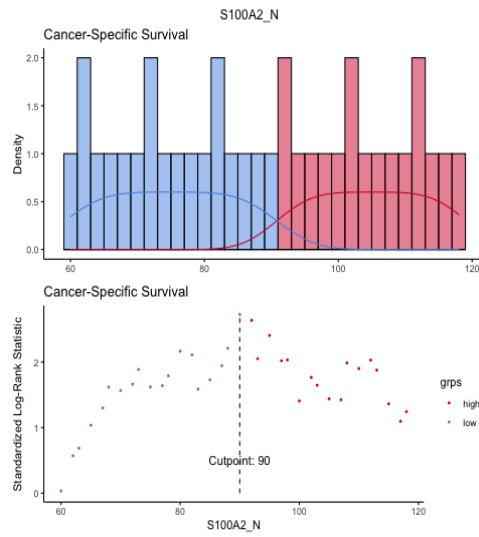

**FigureS4** Cut point generated from R program defined low and high expression of cytoplasmic S100A2 with cancer specific survival

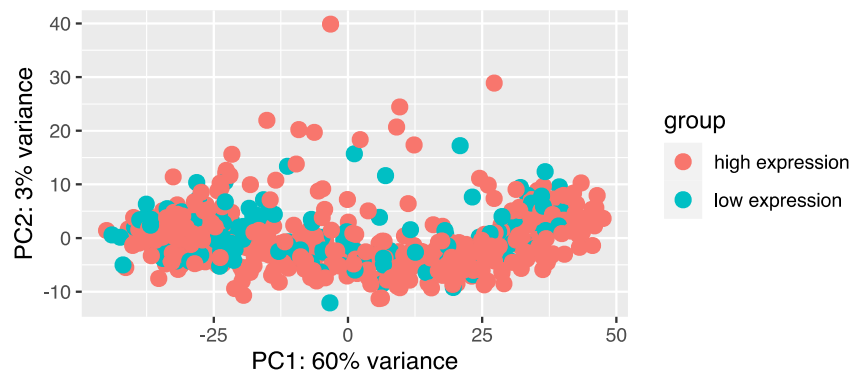

**FigureS5** PCA plot showed the clustering between high (red) and low (blue) cytoplasmic S100A2

| CSS cut offs    |          |           |
|-----------------|----------|-----------|
|                 | cutpoint | statistic |
| <b>CD3FOXP3</b> | 15       | 1.94      |
| <b>CD68</b>     | 8.24     | 4.57      |
| <b>CD163</b>    | 7.35     | 1.73      |
| <b>CD66b</b>    | 1.21     | 3.48      |
| <b>KI67</b>     | 3.27     | 3.65      |

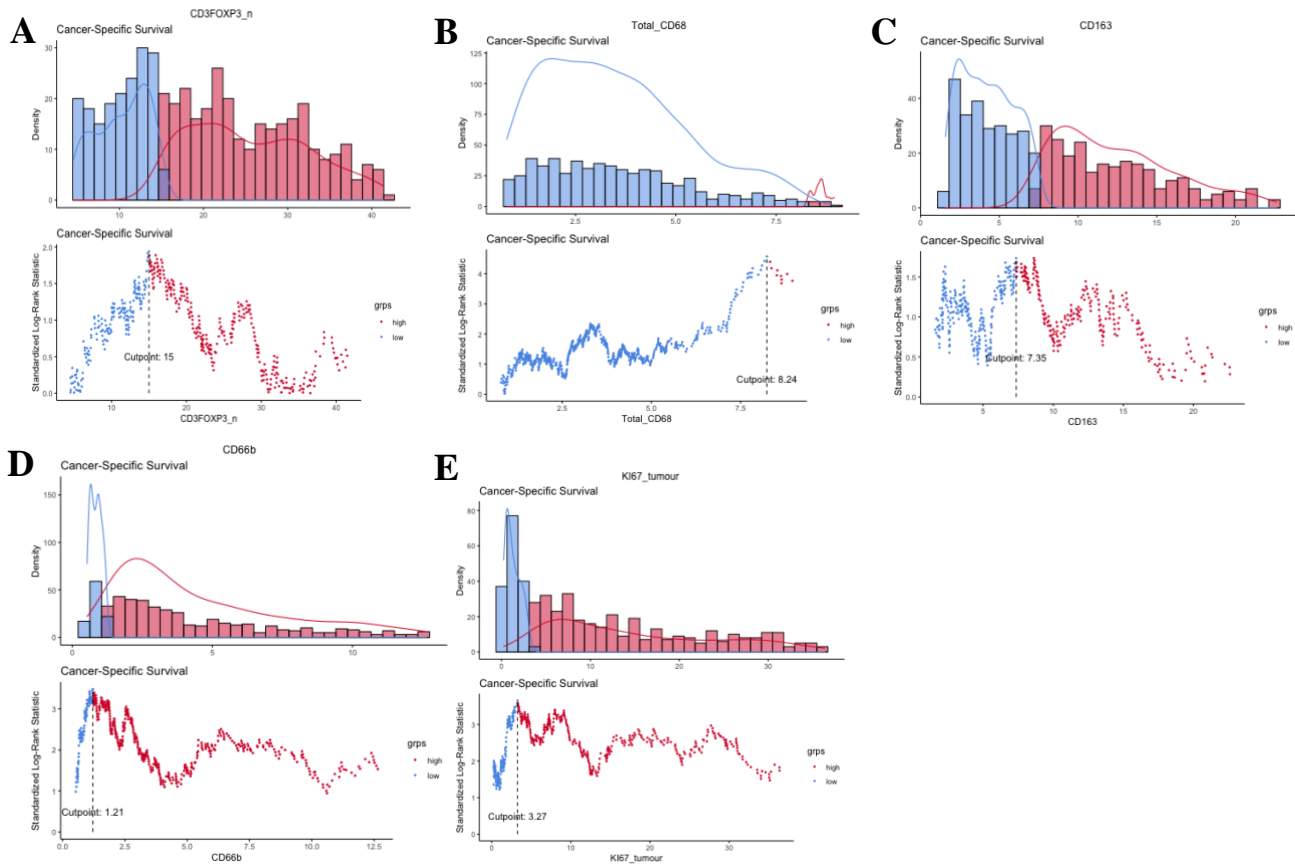

**FigureS6** Cut point generated from R program defined low and high expression of (A) CDFOXP3 (B) CD68 (C) CD163 (D) CD66b and (E) KI67 with cancer specific survival

## Supplementary tables

**TableS1** Antibodies or multiplex staining

| <b>Antibody</b>            | <b>Clone</b>                       | <b>Company</b>                      | <b>Dilution</b> |
|----------------------------|------------------------------------|-------------------------------------|-----------------|
| anti-CD3 (2GV6)            | Rabbit Monoclonal Primary Antibody | Roche Tissue Diagnostics (790-4341) | RTU             |
| Pan-Cytokeratin (AE1/AE3)  | Mouse Monoclonal Antibody          | Leica Biosystems (AE1/AE3-601-L-CE) | 1:250           |
| FOXP3 (236A/E7)            | Mouse Monoclonal Antibody          | abcam (ab20034)                     | 1:20            |
| Actin, Smooth Muscle (1A4) | Mouse Monoclonal Antibody          | Roche Tissue Diagnostics (760-2833) | RTU             |
| CD8a (C8/144B)             | Mouse Monoclonal Antibody          | Cell Signaling Technology (70306)   | 1:100           |
| CD68 (D4B9C) XP®           | Rabbit Monoclonal Antibody         | Cell Signaling Technology (76437)   | 1:200           |
| CD163                      | Rabbit Monoclonal Antibody         | Abcam (ab182422)                    | 1:45000         |
| CD66b                      | Mouse Monoclonal Antibody          | Novus Biological (NB100-77808)      | 1:8000          |

RTU =Ready to use

**Table S2** Patients characteristic (N=644)

| Characteristic         |              |           |
|------------------------|--------------|-----------|
| Sex                    | Female       | 291 (45%) |
|                        | Male         | 353 (55%) |
| Age                    | <65          | 205 (32%) |
|                        | 65-74        | 208 (32%) |
|                        | >75          | 231 (36%) |
| Tumour site            | Right        | 260 (40%) |
|                        | Left         | 384 (60%) |
| MMR status             | dMMR         | 111 (17%) |
|                        | pMMR         | 418 (65%) |
|                        | NA           | 100 (16%) |
|                        | Missing data | 15 (2%)   |
| Local recurrence       | No           | 551 (86%) |
|                        | Yes          | 55 (9%)   |
|                        | Missing data | 38 (5%)   |
| Distant recurrence     | No           | 480 (75%) |
|                        | Yes          | 127 (20%) |
|                        | Missing data | 37 (5%)   |
| TNM stage              | I            | 87 (14%)  |
|                        | II           | 308 (48%) |
|                        | III          | 249 (39%) |
| T stage                | 1            | 30 (5%)   |
|                        | 2            | 74 (12%)  |
|                        | 3            | 375 (58%) |
|                        | 4            | 165 (25%) |
| N stage                | 0            | 395 (61%) |
|                        | 1            | 182 (28%) |
|                        | 2            | 67 (10%)  |
| Margin involvement     | No           | 608 (94%) |
|                        | Yes          | 36 (6%)   |
| Peritoneal involvement | No           | 498 (77%) |
|                        | Yes          | 146 (23%) |

|                    |                             |                                                |
|--------------------|-----------------------------|------------------------------------------------|
| Tumour perforation | No<br>Yes                   | 631 (98%)<br>13 (2%)                           |
| Venous invasion    | No<br>Yes                   | 320 (50%)<br>324 (50%)                         |
| TB                 | Low<br>High<br>Missing data | 441 (69%)<br>180 (28%)<br>23 (3%)              |
| TSP                | Low<br>High<br>Missing data | 490 (76%)<br>133 (21%)<br>21 (3%)              |
| KM                 | Low<br>High<br>Missing data | 519 (81%)<br>103 (16%)<br>22 (3%)              |
| GMS                | 0<br>1<br>2<br>Missing data | 103 (16%)<br>399 (62%)<br>120 (19%)<br>22 (3%) |
| mGPS               | 0<br>1<br>2                 | 409 (64%)<br>137 (21%)<br>98 (15%)             |

dMMR = deficient mismatch repair, pMMR = proficient mismatch repair, TB =Tumour budding, TSP = Tumour stroma percentage, KM = Klintrup-Mäkinen, GMS = Glasgow Microenvironment Score, mGPS = modified Glasgow prognostic score, NA= not available



| Clinicopathological characteristics | Univariable analysis  |          | Multivariate analysis |          |
|-------------------------------------|-----------------------|----------|-----------------------|----------|
|                                     | Hazard ratio (95% CI) | <i>P</i> | Hazard ratio (95% CI) | <i>P</i> |
| <b>Sex</b>                          | 1.32 (0.97-1.79)      | 0.082    |                       |          |
| <b>Age</b>                          | 1.29 (1.06-1.55)      | 0.009    | 1.40 (1.13-1.75)      | 0.003    |
| <b>MMR status</b>                   | 0.67 (0.52-0.88)      | 0.003    |                       |          |
| <b>Local recurrence</b>             | 6.95 (4.85-9.98)      | <0.001   | 3.83 (2.60-5.64)      | <0.001   |
| <b>Distant recurrence</b>           | 24.39 (16.26-36.58)   | <0.001   | 23.14 (14.76-36.27)   | <0.001   |
| <b>TNM stage</b>                    | 2.49 (1.92-3.24)      | <0.001   |                       |          |
| <b>T stage</b>                      | 1.88 (1.49-2.38)      | <0.001   |                       |          |
| <b>N stage</b>                      | 2.09 (1.72-2.54)      | <0.001   | 1.64 (1.28-2.12)      | <0.001   |
| <b>Margin involvement</b>           | 4.05 (2.58-6.34)      | <0.001   | 3.67 (2.01-6.67)      | <0.001   |
| <b>Peritoneal involvement</b>       | 2.07 (1.51-2.84)      | <0.001   |                       |          |
| <b>Tumour perforation</b>           | 2.65 (1.17-5.99)      | 0.019    |                       |          |
| <b>Venous invasion</b>              | 1.51 (1.11-2.04)      | 0.008    |                       |          |
| <b>TB</b>                           | 1.88 (1.37-2.56)      | <0.001   | 1.68 (1.16-2.42)      | 0.006    |
| <b>S100A2</b>                       | 0.54 (3.94-0.74)      | <0.001   |                       |          |
| <b>GMS</b>                          | 1.74 (1.35-2.25)      | <0.001   |                       |          |
| <b>mGPS</b>                         | 1.42 (1.18-1.72)      | <0.001   |                       |          |

**Table S3** Univariate and Multivariate analysed for cancer specific survival (CSS)

MMR = Mismatch repair, TB = Tumour budding, GMS = Glasgow Microenvironment Scores, mGPS = modified Glasgow prognostic score
